# Supplementary material for: CRISPR/Cas9-induced modification of the conservative promoter region of VRN-A1 alters the heading time of hexaploid bread wheat
Source: PubMed Central journal article supplement (PMC9760837; doi:10.3389/fpls.2022.1048695), 2022-12-05
Supplement: DataSheet_1.pdf [file DataSheet_1.pdf]

## Supplementary Material

### CRISPR/Cas9-induced modification of the conservative promoter region of *VRN-A1* alters the heading time of hexaploid bread wheat

Dmitry Miroshnichenko, Vadim Timerbaev, Anna Klementyeva, Alexander Pushin, Tatiana Sidorova, Dmitry Litvinov, Lubov Nazarova, Olga Shulga, Mikhail Divashuk, Elena Salina, Gennady Karlov, Sergey Dolgov

TGAAAGGAAAAATTCTGCTCGTTTTTTTGGCTCTGTGGTGTGTGTTTGTGGCGAGAGAA  
AATGATTTGGGGAAAGCAAAATCCGGAGATTCGCACGTACGATCGTTCGACACGTCGA  
CGCCCGGCGGGCCCGGGGTGGGGCATCGTGTGGCTGCAGGACCGCGGGGCCCGCAA  
AGCGGGCCGGGCCAATGGGTGCTCGACAGCGGCTATGCTCCAGACCAGCCCGGTATTG  
CATACCGCGCTCGGGGCCAGATCCCTTTAAAAACCCCTCCCCCCTTGCCGGAATCCTC  
GTTTTGGCCTGGCCATCCTCCCTCTCCTCCCCTCTCTTCCACCTCACGTCCTCACCCAA  
CCACCCTGATAGCCATGGCTCCGCCGCTCGCCTCCGCCTGCGCCAGTCGGAGTAGCCG  
TCGCGGTCTGCCGGTGTGGAGGGTAGGGGCGTAGGGTTGGCCCGGTTCTCGAGCGG  
AGATGGGGCGGGGAAGGTGCAGCTGAAGCGGATCGAGAACAAGATCAACCGGCAG  
GTGACCTTCTCAAGCGCCGCTCGGGGCTTCTCAAGAAGGCGCACGAGATCTCCGTGC  
TCTGCGACGCCGAGGTGGCCTCATCATCTTCTCCACCAAGGGAAAGCTCTACGAGTT  
CTCCACCGAGTCATGGTAAATTAAGCACGCGCTGTCTTTAAATTTGTTCCCCAATACGC  
CTTCG

**Supplementary Figure S1.** The *vrn-A1* promoter sequence with target regions (outlined as boxes) for CRISPR/Cas9 genome modifications. Yellow letters mark the VRN box, green letters mark the 50-bp sequence located between -62 and -112 bp of the promoter region.

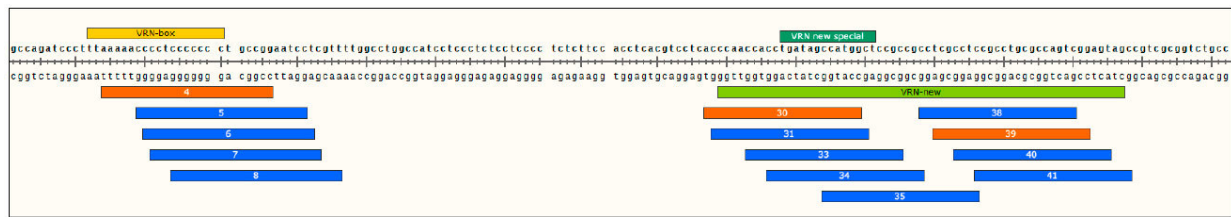

**Supplementary Figure S2.** Presentation of the recessive *vrn-A1* promoter sequence of ‘Chinese Spring’ (used as wild-type) and target locations for CRISPR/Cas9-mediated editing of two promoter regions, including the VRN-box (highlighted in yellow) and the conserved 59 bp region (highlighted in green); positively oriented target sequences are highlighted in red, reverse oriented sequences are highlighted in blue.

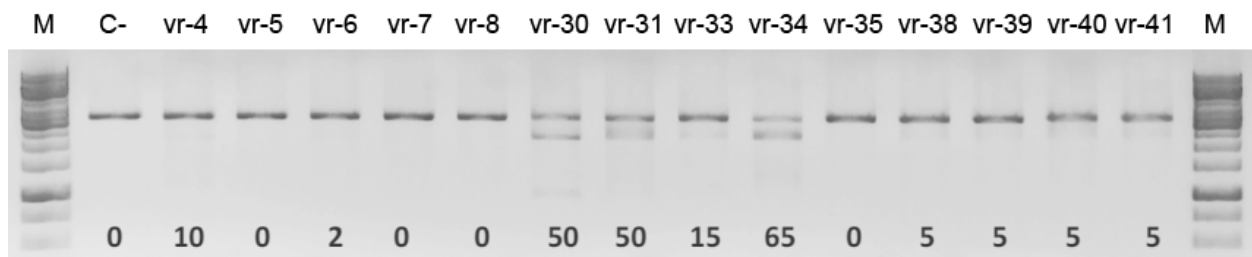

**Supplementary Figure S3.** In vitro cleavage assay of the *vrn-A1* promoter DNA fragment with sgRNA candidates. A linearized DNA substrate of ‘Chinese Spring’ was used as a negative control (WT), without addition of the pre-assembled RNP complex. The band intensity of the non-cleaved WT was taken as 100% and densitometrically compared with the values of experimental bands; the cleavage efficiency (indicated in the lower part of the gel) was determined as the difference between WT (= 0% efficiency) and the value for each individual sgRNA.

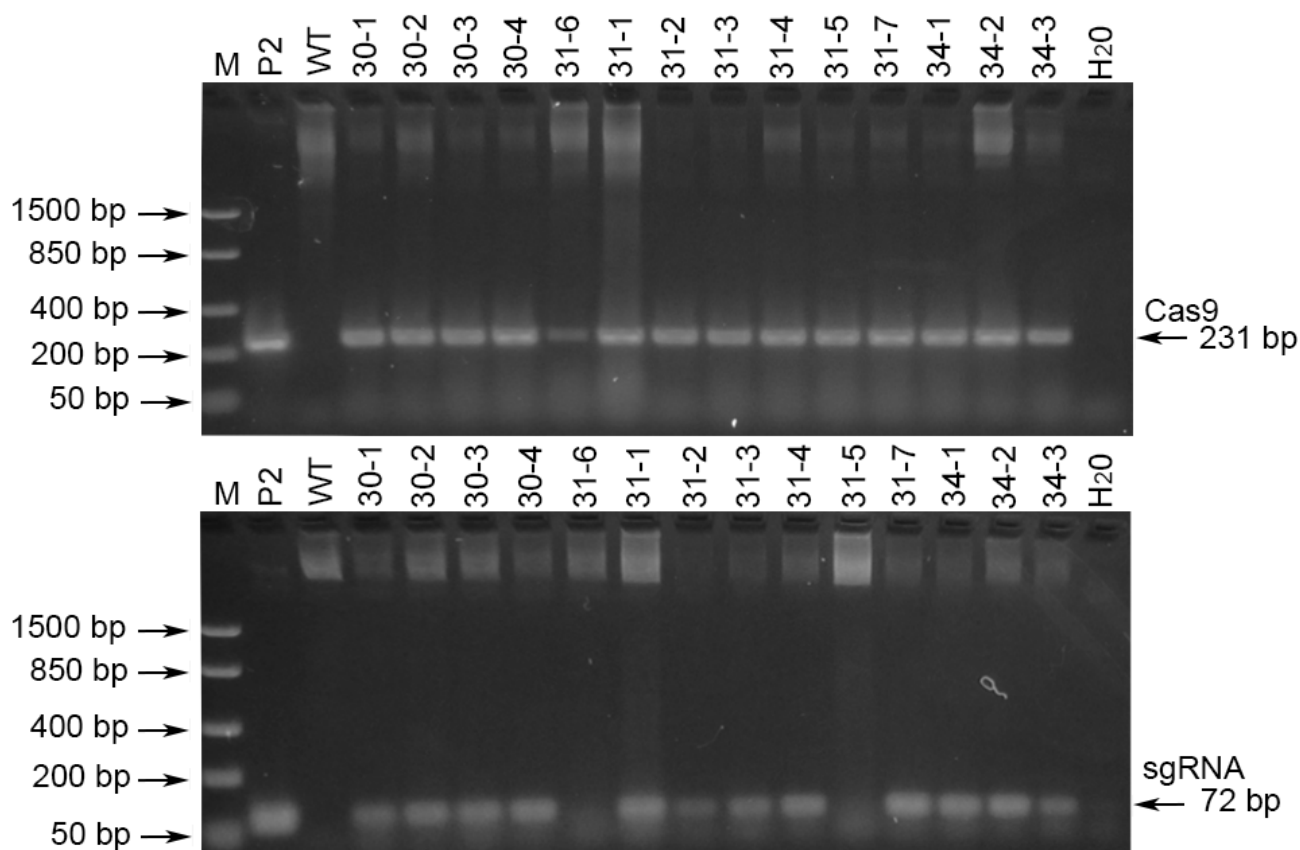

**Supplementary Figure S4.** Example identification of transgenic events. Putative transgenic wheat plants were analyzed for the presence of representative PCR products of Cas9 and sgRNA amplified from the DNA of individual events. Lane M, DNA ladder as molecular weight marker; lane P1, plasmid DNA of pGCB; lane P2, plasmid DNA of pgRNA-VRNA1#30; lane WT, untransformed ‘Chinese Spring’ wheat plant; numbers represent individual primary T<sub>0</sub> plants, generated after transformation with pgRNA-VRNA1#30 (30-1, 30-2, 30-3, 30-4, 30-7), pgRNA-VRNA1#31 (31-1, 31-2, 31-3, 31-4, 31-5, 31-6, 31-7) and pgRNA-VRNA1#34(34-1, 34-2, 34-3)

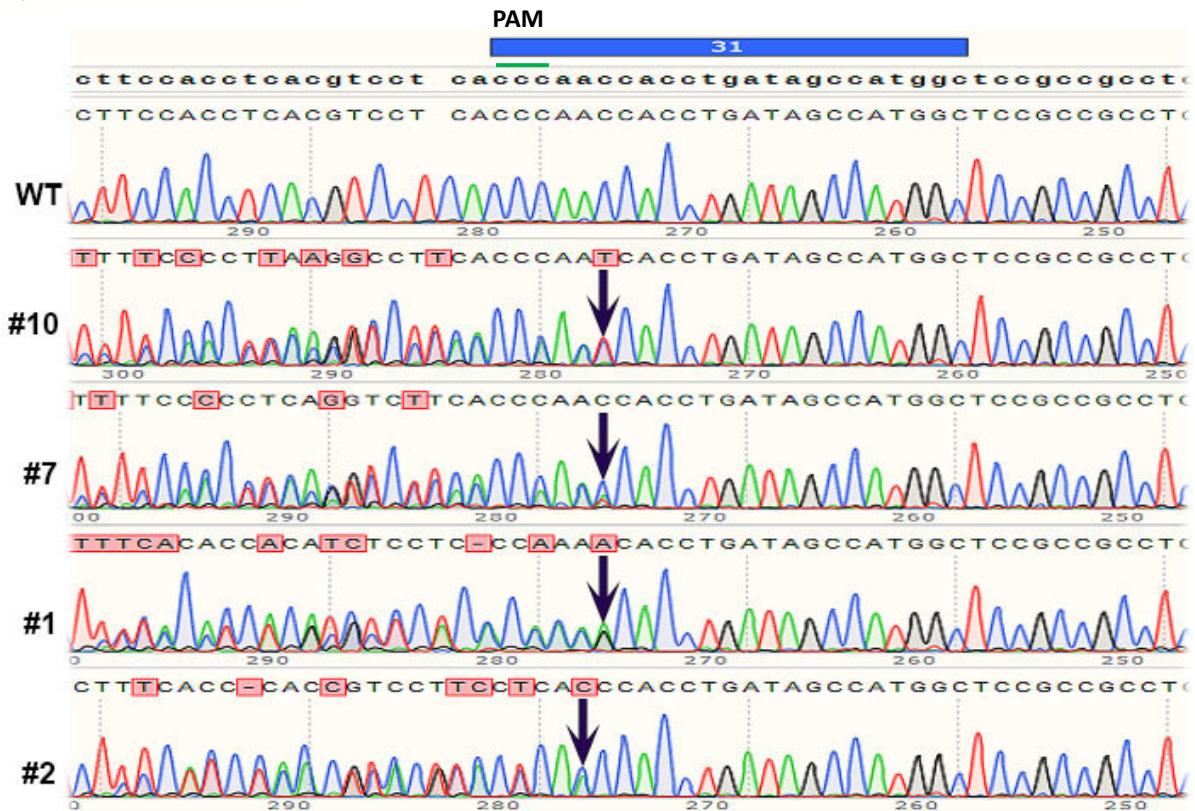

**Supplementary Figure S5.** Sequencing chromatogram of the PCR products demonstrating either loss of peak/gain of peak or overlapping peaks around the target site in the mutate lines: #1, #2, #7, and #10. Sequence of the recessive *vrn-A1* promoter (WT) is shown on top of the sequencing histogram for comparison.

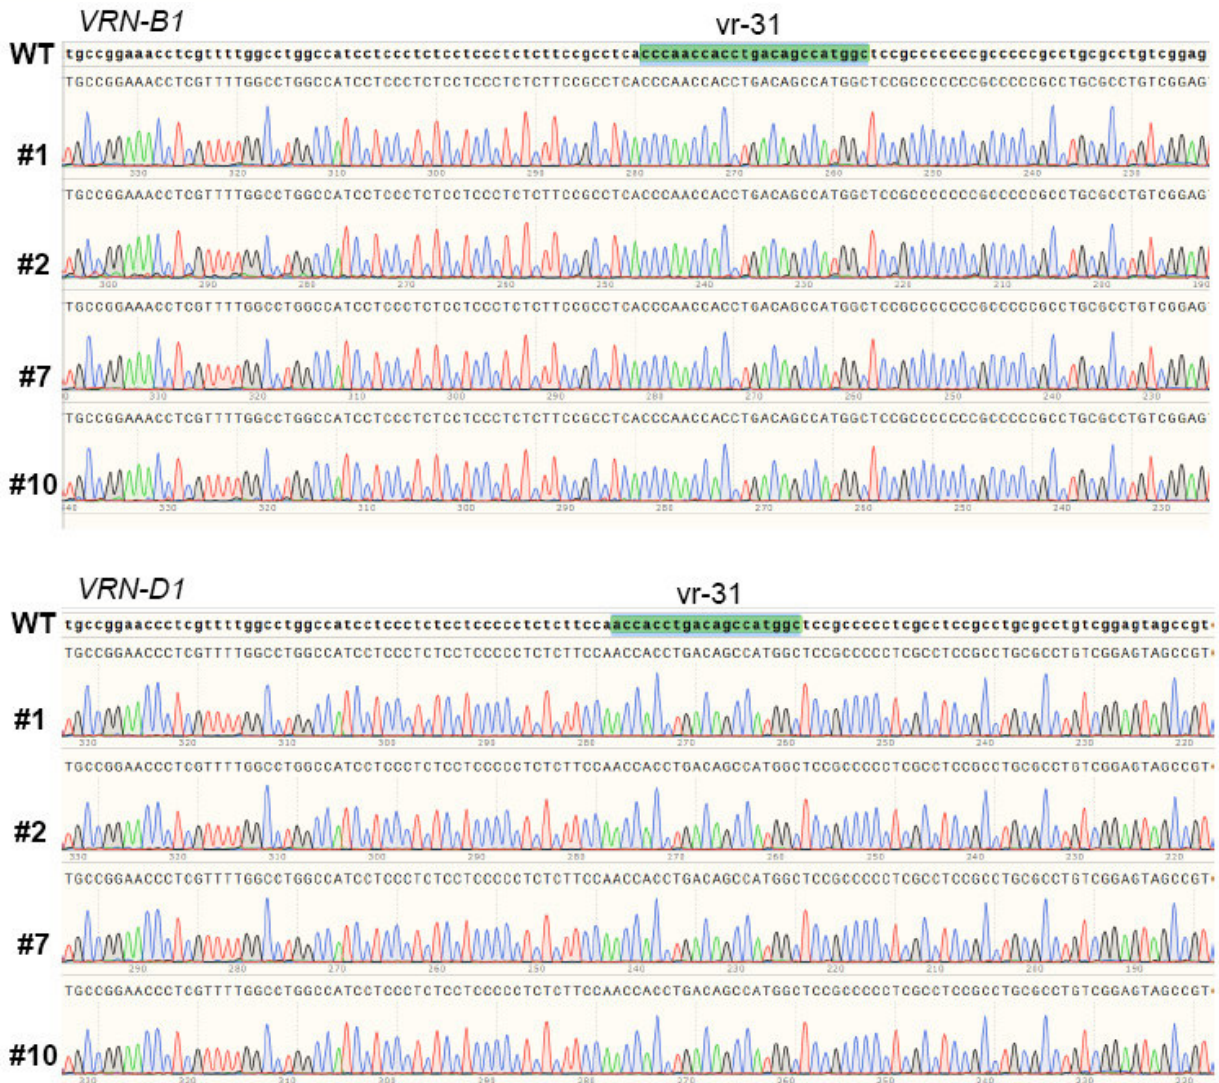

**Supplementary Figure S6.** Analysis of possible changes in the nucleotide sequence of the promoter region of the *vrn-1B* and *Vrn-1D* genes in transgenic wheat plants #1, #2, #7, and #10 carrying induced mutations in the *VRN-A1* sequence. Reference sequences of the promoter region of the *vrn-1B* and *Vrn-1D* genes are shown on top of sequencing histograms and include the fragment that resembles the sequence of the vr-31 sgRNA.





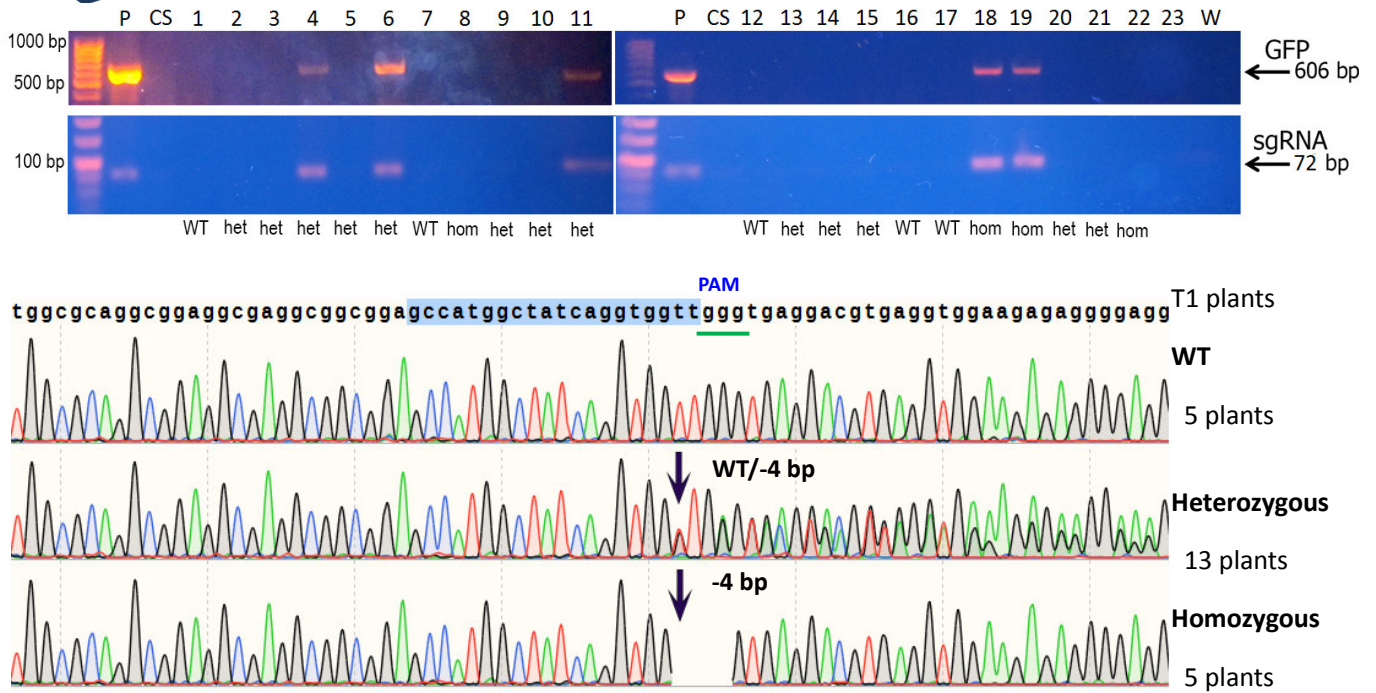

**Supplementary Figure S8.** Inheritance analysis of 31-2 primary event, carrying the monoallelic deletion of four nucleotides in the target region of the *vrn-A1* promoter.

Top panel. PCR analysis of transgene segregation (GFP and sgRNA scaffold); lane P, the corresponding plasmid DNA of pGCB or pgRNA-VRNA1#31; lane CS, untransformed ‘Chinese Spring’ wheat plant; numbers 1-23 represent individual T1 plants generated after selfing of the 31-2 primary plant, with the indication of mutation inheritance type (WT, heterozygous, homozygous) in the bottom of panel.

Bottom panel. Sequencing chromatograms of the *vrn-A1* promoter fragment demonstrating new combinations of CISPR/Cas-9-induced indels in various T1 plants; T1 plants PAM sequences are marked in green.

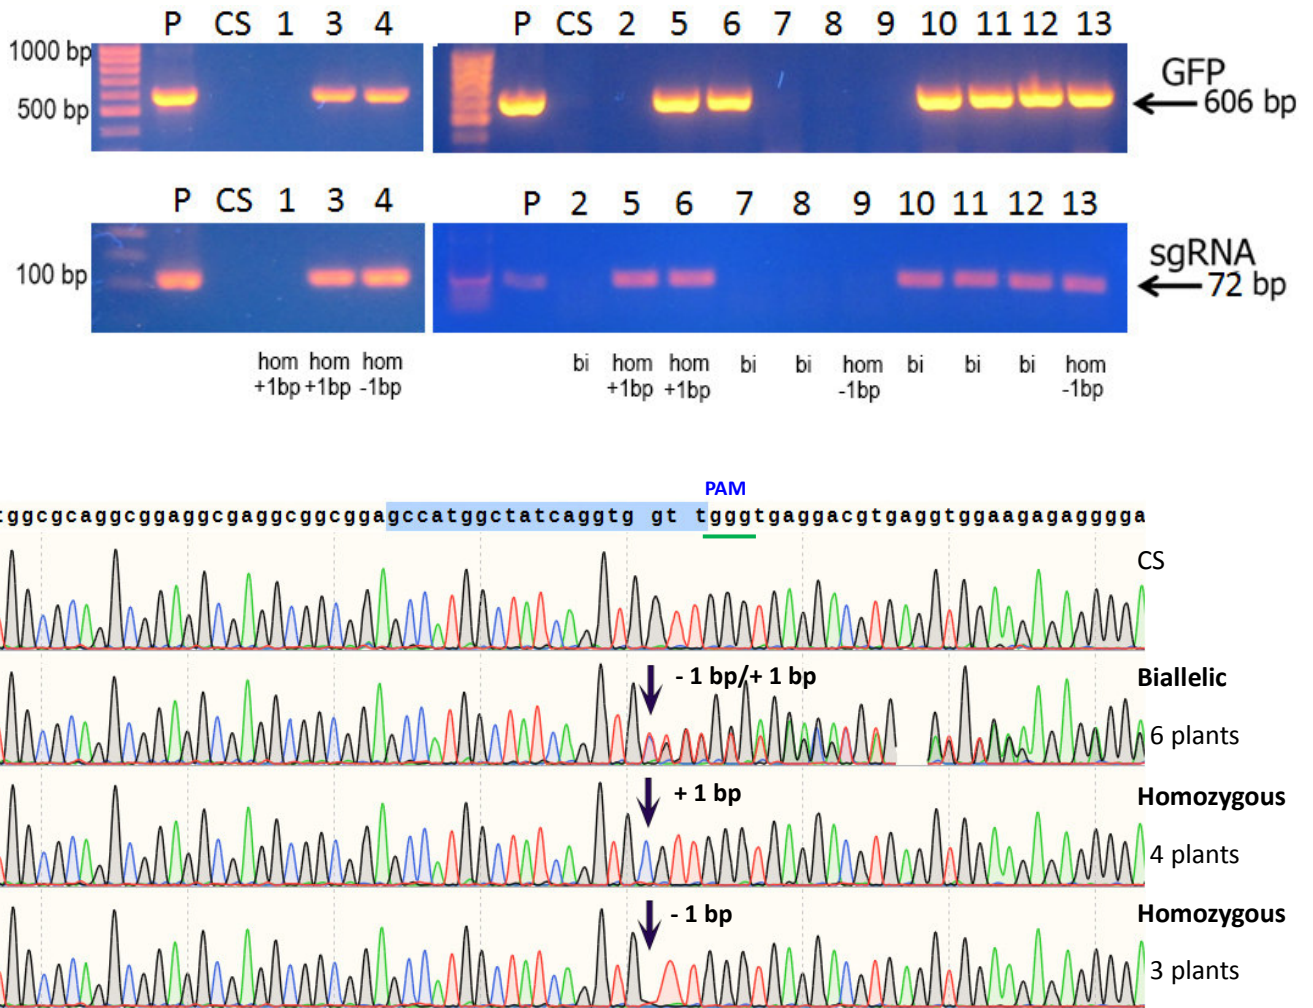

**Supplementary Figure S9.** Inheritance analysis of the 31-7 primary event carrying the biallelic nucleotides changes in the target region of the *vrn-A1* promoter.

Top panel. PCR analysis of transgene segregation (GFP and sgRNA scaffold); lane P, the corresponding plasmid DNA of pGCB or pgrRNA-VRNA1#31; lane CS, untransformed ‘Chinese Spring’ wheat plant; numbers 1-23 represent individual T1 plants generated after selfing of the 31-7 primary plant, with the indication of inheritance type of the mutation (biallelic and homozygous) in the bottom of panel.

Bottom panel. Sanger sequencing chromatograms the *vrn-A1* promoter fragments demonstrating the one biallelic and two homozygous combinations of CRISPR/Cas9-induced indels in various T1 plants; PAM sequences are marked in green.



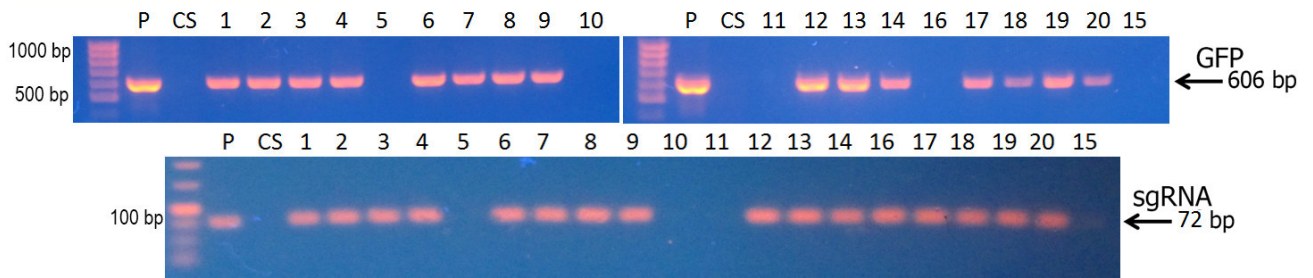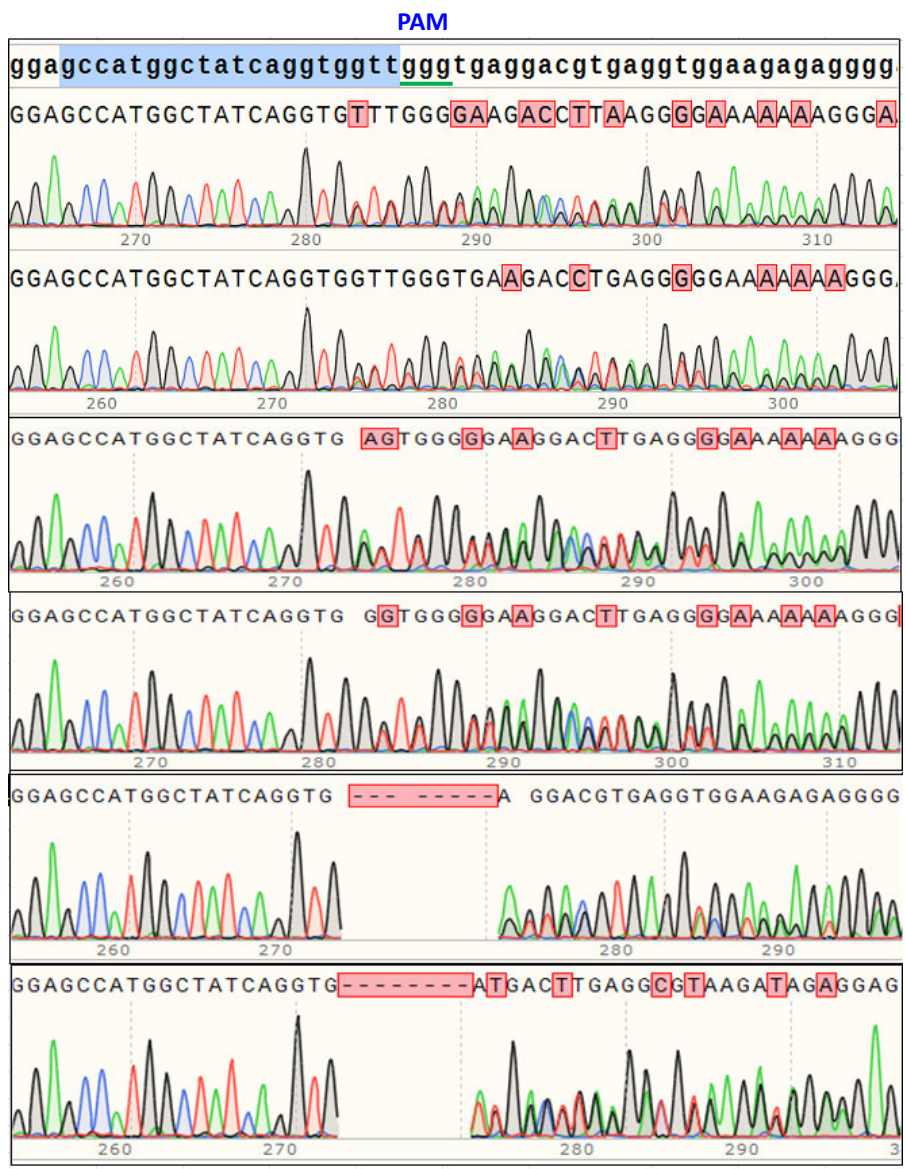

T1 plants:  
 WT/WT 31-10 wt  
 (6 plants)  
 WT/-1 bp (6 plants)  
 31-10-2, 31-10-3, 31-10-6,  
 31-10-8, 31-10-12, 31-10-14  
 WT/+1 bp (1 plant)  
 31-10-7  
 WT/+1 bp (3 plants)  
 31-10-9, 31-10-11, 31-10-13  
 WT/+1 bp (1 plant)  
 31-10-15  
 WT/ -8 bp (1 plant)  
 31-10-18  
 - 1 bp / -8 bp (1 plant)  
 31-10-19

**Supplementary Figure S10.** Inheritance analysis of the 31-10 primary event carrying the monoallelic nucleotide insertion in the target region of *vrn-A1* promoter.

Top panel. PCR analysis of transgene segregation (*GFP* and sgRNA scaffold); lane P, the corresponding plasmid DNA of pGCB or pgRNA-VRNA1#31; lane CS, untransformed 'Chinese Spring' wheat plant; numbers 1-20 represent individual T1 plants generated after selfing of the 31-10 primary plant.

Bottom panel. Sequencing chromatograms of *vrn-A1* promoter fragment demonstrating new combinations of CRISPR/Cas9-induced indels in various T1 plants; PAM sequences are marked in green.

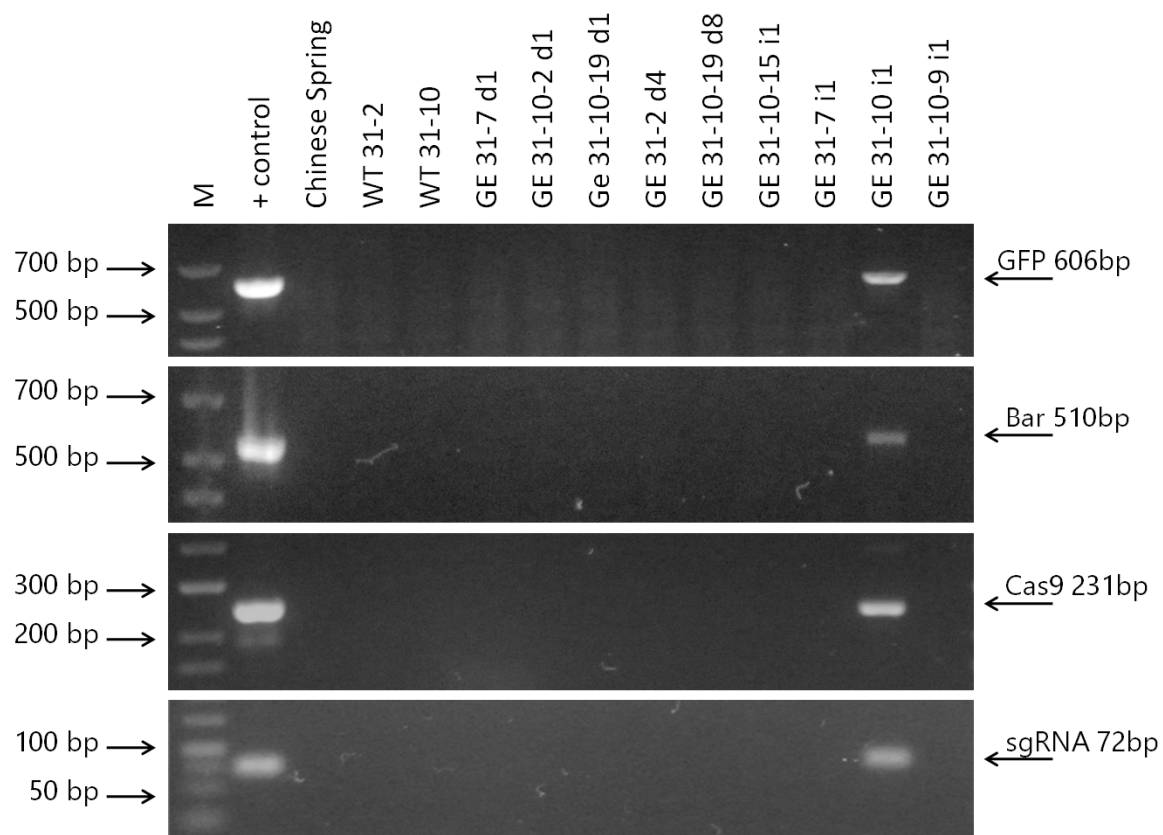

**Supplementary Figure S11.** PCR analysis for the presence of various transgenic sequences in genome-edited mutated lines used for heading time analysis; lane + control, the corresponding plasmid DNA of pGCB or pgRNA-VRNA1#31 vectors used to produce primary mutated plants; lane Chinese Spring, the DNA of non-transformed wheat cultivar used for genetic modification; the rest of lines, M3 wheat populations carrying various types of CRISPR/Cas9-induced mutations in the target region of *vrn-A1* promoter (for details see Supplementary Table S6). Analyzed M3 populations are transgene-free, except the line GE31-10 i1.

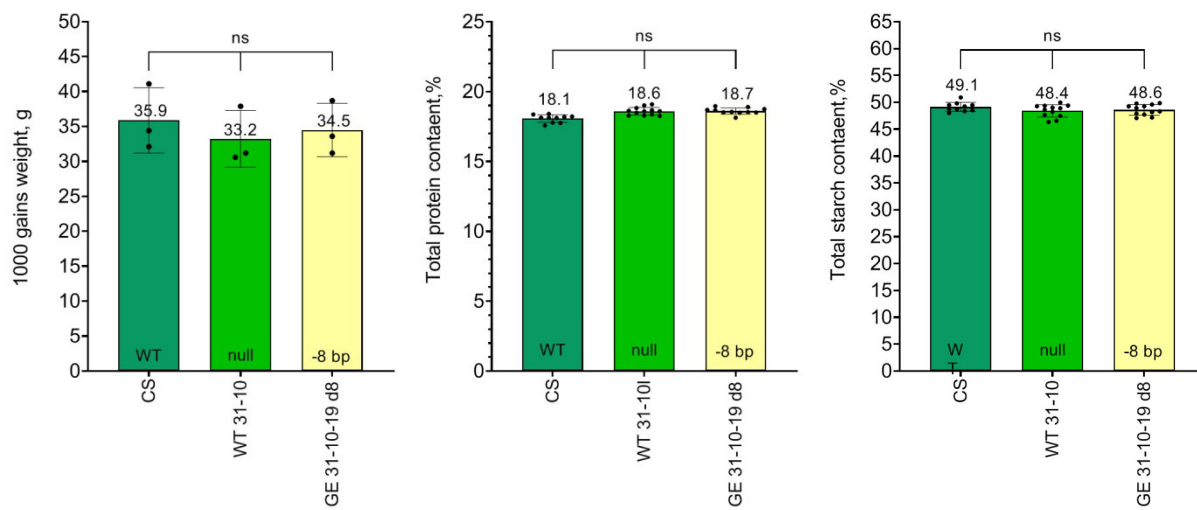

**Supplementary Figure S12.** Grain quality tests of wheat plants carrying the 8 bp deletion in the promoter region of *vrn-A1* gene (GE 31-10-19 d8), non-transformed ‘Chinese Spring’ plants (CS) and plants of the transgene-free null-segregant WT 31-10, ns – non significant, Tukey's multiple comparisons test.

**Supplementary Table S1.** List of primers used in this study

| Primer name           | Sequence (5' – 3')                                                                  | Purpose                         |
|-----------------------|-------------------------------------------------------------------------------------|---------------------------------|
| VRN-A1                | CTGAATTCTGAAAGGAAAAATTCTGCTCG<br>ACTGGTACCGAAGGCGTATTGGGGAAC                        | promoter cloning and sequencing |
| VRN-A1                | AAAAGCACCGACTCGGTGCCACTTTTTCAAGTTGATAACGGG<br>CTAGCCTTATTTAACTTGCTATTTCTAGCTCTAAAAC | cleavage assay                  |
| Cas9                  | ACGCGAACCTGGATAAGGTC<br>CGATCCTCGTCTCGTACAG                                         | PCR analysis                    |
| sgRNA scaffold region | TCGATCCGTAGAAACCAGACG<br>CGACTCGGTGCCACTTTTTTC                                      | PCR analysis                    |
| GFP                   | GCGACGTAAACGGCCACAAG<br>CCAGCAGGACCATGTGTGATCG                                      | PCR analysis                    |
| Ubi1-BAR              | GGATGATGGCATATGCAGCAGCTATATG<br>ACAGCGACCACGCTCTTGAA                                | PCR analysis                    |
| VRN-B1                | CTGAATTCATAGTAGTATAAAAAGGACAATTG<br>CTGGTACCACCGAATCAACCAAACAGTG                    | sequencing                      |
| VRN-D1                | CTGAATTCGTATAAAAAGGAAAATTGTGCTCT<br>ACTGGTACCATCAACCAAACAGCCCCG                     | sequencing                      |
| VRN-A1                | TCCACCGAGTCATGTATGGA<br>GAGAACCTTTTCTGCATAAGAA                                      | qPCR                            |
| TaWIN                 | TTTTCTGTGTTCTACTATGAGATCTTGAA<br>AAGTGCATAATTAACAGAGGTAGTGATG                       | qPCR                            |

**Supplementary Table S2.** List of predicted target sequences identified in two regions of the *vrn-A1* promoter (see Figure 1)

| sgRNA | Sequence (5'-3')        | orientation |
|-------|-------------------------|-------------|
| vr-4  | AAAACCCCTCCCCCCTGCCGG   | +           |
| vr-5  | CCCCTCCCCCCTGCCGGAATCC  | -           |
| vr-6  | CCCTCCCCCCTGCCGGAATCCT  | -           |
| vr-7  | CCTCCCCCCTGCCGGAATCCTC  | -           |
| vr-8  | CCCCCCTGCCGGAATCCTCGTT  | -           |
| vr-30 | ACCCAACCACCTGATAGCCATGG | +           |
| vr-31 | CCCAACCACCTGATAGCCATGGC | -           |
| vr-33 | CCACCTGATAGCCATGGCTCCGC | -           |
| vr-34 | CCTGATAGCCATGGCTCCGCCGC | -           |
| vr-35 | CCATGGCTCCGCCGCTCGCCTC  | -           |
| vr-38 | CCTCGCCTCCGCCTGCGCCAGTC | -           |
| vr-39 | TCGCCTCCGCCTGCGCCAGTCGG | +           |
| vr-40 | CCTCCGCCTGCGCCAGTCGGAGT | -           |
| vr-41 | CCGCCTGCGCCAGTCGGAGTAGC | -           |



**Supplementary Table S3.** Efficiency of genetic co-transformation and targeted mutagenesis in T0 transgenic events of ‘Chinese Spring’ generated after co-transformation with CRISPR/Cas9 encoding vectors

| sgRNA expressing vector * | Number of bombarded explant | Number of GFP positive/herbicide resistant T0 plants | Number of PCR positive T0 plants |       | Co-transformation efficiency (Cas9+sgRNA), % | Number of T0 events with mutation | Mutagenesis frequency, % |
|---------------------------|-----------------------------|------------------------------------------------------|----------------------------------|-------|----------------------------------------------|-----------------------------------|--------------------------|
|                           |                             |                                                      | Cas9                             | sgRNA |                                              |                                   |                          |
| pgRNA-VRNA1#30            | 652                         | 9                                                    | 9                                | 9     | 1.4                                          | 0                                 | 0.0                      |
| pgRNA-VRNA1#31            | 603                         | 10                                                   | 10                               | 8     | 1.3                                          | 4                                 | 0.7                      |
| pgRNA-VRNA1#34            | 500                         | 6                                                    | 6                                | 6     | 1.2                                          | 0                                 | 0.0                      |

\* In all experiments the vector encoding specific sgRNA was co-bombarded into morphogenic tissues with the plasmid pGCB carrying sequences for the expression of *Cas9*, *GFP* and *bar* genes

**Supplementary Table S4** Summary of inheritance of CRISPR/Cas9-induced indels and segregation of transgenes in T1 plants produced after self pollination of four primary mutated wheat plants\*

| T0 plant | Number of T1 plants tested | Segregation of transgenes ** |                                                          |                                                                       | Segregation of mutation ***                               |                                                                     |                                                    |      |      |      |
|----------|----------------------------|------------------------------|----------------------------------------------------------|-----------------------------------------------------------------------|-----------------------------------------------------------|---------------------------------------------------------------------|----------------------------------------------------|------|------|------|
|          |                            | vector                       | Observed transgene segregation ratio (positive:negative) | $\chi^2$ value for the expected segregation ratio (positive:negative) | Observed segregation ratio (null:monoallelic: homozygous) | $\chi^2$ value for the expected segregation ratio                   | 1 [null] : 2 [monoallelic mutation] : 1 [mutation] |      |      |      |
| 31-1     | 10                         | pGCB                         | 8 : 2                                                    | 0.13                                                                  | 3.23                                                      | 1 : 7 : 2                                                           | 1.20                                               | 1.6  | 0.13 |      |
|          |                            | pgRNA-VRNAI#31               | 10 : 0                                                   | -                                                                     | -                                                         |                                                                     |                                                    |      |      |      |
| 31-2     | 23                         | pGCB                         | 5 : 18                                                   | 34.8 ns                                                               | 203.6 ns                                                  | 5 : 13 : 5                                                          | 0.13                                               | 0.39 | 0.13 |      |
|          |                            | pgRNA-VRNAI#31               | 5 : 18                                                   | 34.8 ns                                                               | 203.6 ns                                                  |                                                                     |                                                    |      |      |      |
| 31-10    | 20                         | pGCB                         | 15 : 5                                                   | 0.00                                                                  | 15.0 ns                                                   | Not available due to himerism of the primary T0 plant               |                                                    |      |      |      |
|          |                            | pgRNA-VRNAI#31               | 15 : 5                                                   | 0.00                                                                  | 15.0 ns                                                   |                                                                     |                                                    |      |      |      |
| 31-7     | 13                         | pGCB                         | 8 : 5                                                    | 1.26                                                                  | 23.02 ns                                                  | (homozygous for mutation 1 : biallelic : homozygous for mutation 2) | 4 : 6 : 3                                          | 0.23 | 0.08 | 0.03 |
|          |                            | pgRNA-VRNAI#31               | 8 : 5                                                    | 1.26                                                                  | 23.02 ns                                                  |                                                                     |                                                    |      |      |      |

\* the presence of transgenic sequences in the genome of individual plants was assessed by PCR and GFP fluorescence in pollen

\*\* the segregation of transgenes was analyzed using  $\chi^2$  value for the expected Mendelian 1 [transgene negative] : 3 [transgene positive] ratio; if the  $\chi^2$  value is above 3.84 ( $P > 0.05$ ) the observed segregation ratio is not significantly different from the expected ratio

\*\*\* indels segregation was confirmed by sequencing of amplicons corresponding to the target region of *vrn-A1* promoter and analyzed using  $\chi^2$  value for the expected Mendelian 1 [null] : 2 [monoallelic mutation] : 1 [homozygous mutation] ratio or 1 [homozygous mutation 1] : 2 [biallelic mutations] : 1 [homozygous mutation 2] ratio; if the  $\chi^2$  value is above 3.84 ( $P > 0.05$ ) the observed segregation ratio is not significantly different from the expected ratio

**Supplementary Table S5.** Summary of inheritance of CRISPR/Cas9-induced indels and segregation of transgenes in T2 plants produced after self pollination of #31-10 T1 plants \*

| T1 plant | Transgene status* | Type of indels in the T1 plant                                           | T2 plants analyzed | T2 plants with the various type of indel segregation** |              |        |              |      |              | T2 plants not inherited transgenes (GM-free)*** |              |                                   |      |                                                |
|----------|-------------------|--------------------------------------------------------------------------|--------------------|--------------------------------------------------------|--------------|--------|--------------|------|--------------|-------------------------------------------------|--------------|-----------------------------------|------|------------------------------------------------|
|          |                   |                                                                          |                    | WT                                                     | $\chi^2$ 1:3 | hetero | $\chi^2$ 2:2 | homo | $\chi^2$ 1:3 | All                                             | $\chi^2$ 1:3 | with homozygous indel segregation |      |                                                |
| 31-10-2  | Cas9+ sgRNA       | AGGAGTGGGTTTGTGGACTATCGGTACCGAGGCC<br>AGGAGTGGGTTGGTGGACTATCGGTACCGAGGCC | 18                 | 4                                                      | 0.07         | 9      | 0.00         | 5    | 0.07         | 5                                               | 0.07         | 5                                 | 0.07 | 2                                              |
| 31-10-7  | Cas9+ sgRNA       | AGGAGTGGGTTGGTGGACTATCGGTACCGAGGCC<br>AGGAGTGGGTTGTGGACTATCGGTACCGAGGCC  | 14                 | 5                                                      | 0.86         | 5      | 1.14         | 4    | 0.10         | 3                                               | 0.09         | 3                                 | 0.09 | 0                                              |
| 31-10-9  | Cas9+ sgRNA       | AGGAGTGGGTTGGTGGACTATCGGTACCGAGGCC<br>AGGAGTGGGTTGTGGACTATCGGTACCGAGGCC  | 10                 | 1                                                      | 1.20         | 6      | 0.40         | 3    | 0.13         | 3                                               | 0.13         | 3                                 | 0.13 | 1                                              |
| 31-10-11 | free              | AGGAGTGGGTTGGTGGACTATCGGTACCGAGGCC<br>AGGAGTGGGTTGTGGACTATCGGTACCGAGGCC  | 10                 | 3                                                      | 0.13         | 6      | 0.40         | 1    | 1.20         | 10                                              | -            | 10                                | -    | 1                                              |
| 31-10-15 | free              | AGGAGTGGGTTGGTGGACTATCGGTACCGAGGCC<br>AGGAGTGGGTTGGTGGACTATCGGTACCGAGGCC | 19                 | 3                                                      | 0.86         | 9      | 0.05         | 7    | 1.42         | 19                                              | -            | 19                                | -    | 7                                              |
| 31-10-19 | Cas9+ sgRNA       | AGGAGTGGGTTGTGGACTATCGGTACCGAGGCC<br>AGGA-----GTGGACTATCGGTACCGAGGCC     | 19                 | -                                                      | -            | 10     | 0.05         | 9    | 1.42         | 7                                               | 1.42         | 7                                 | 1.42 | 3<br>2 plants with -1 bp<br>1 plant with -8 bp |

\* presence of transgenic sequences in the genome of individual plants was assessed by PCR and GFP fluorescence in pollen

\*\* indel segregation was confirmed by sequencing of amplicons corresponding to the target region of *vrn-A1* promoter, the indel segregation was analysed using  $\chi^2$  value for the expected Mendelian 1 [null] : 2 [monoallelic mutation] : 1 [homozygous mutation] ratio, if the  $\chi^2$  value is above 3.84 ( $P > 0.05$ ) the observed segregation ratio is not significantly different from the expected ratio

\*\*\* the segregation of transgenes was analyzed using  $\chi^2$  value for the expected Mendelian 1 [transgene negative] : 3 [transgene positive] ratio, if the  $\chi^2$  value is above 3.84 ( $P > 0.05$ ) the observed segregation ratio is not significantly different from the expected ratio

**Supplementary Table S6.** List of the T3 (M3) population used for greenhouse-based analysis of the heading time

| Mutation type |                                    | Line           | Plants analyzed* | Transgene status** |
|---------------|------------------------------------|----------------|------------------|--------------------|
| WT            | AGGAGTGGGTTGGTGGACTATCGGTACCGAGGCG | Chinese Spring | 61               | FREE               |
| null          | AGGAGTGGGTTGGTGGACTATCGGTACCGAGGCG | WT 31-2        | 27               | FREE               |
|               |                                    | WT 31-10       | 45               |                    |
| -1 bp         | AGGAGTGGGTTGTGGACTATCGGTACCGAGGCG  | GE 31-7 d1     | 51               | FREE               |
|               |                                    | GE 31-10-2 d1  | 24               |                    |
|               |                                    | Ge 31-10-19 d1 | 48               |                    |
| -4 bp         | AGGAGTGGGTGGTGGACTATCGGTACCGAGGCG  | GE 31-2 d4     | 59               | FREE               |
| -8 bp         | AGGAGTGGTGGACTATCGGTACCGAGGCG      | GE 31-10-19 d8 | 71               | FREE               |
| +1 bp         | AGGAGTGGGTTGGTGGACTATCGGTACCGAGGCG | GE 31-10-15 i1 | 45               | FREE               |
| +1 bp         | AGGAGTGGGTTGGTGGACTATCGGTACCGAGGCG | GE 31-7 i1     | 48               | FREE               |
| +1 bp         | AGGAGTGGGTTGGTGGACTATCGGTACCGAGGCG | GE 31-10 i1    | 45               | Cas9+sgRNA         |
| +1 bp         | AGGAGTGGGTTGGTGGACTATCGGTACCGAGGCG | GE 31-10-9 i1  | 24               | FREE               |

\* only plants carrying homozygous mutated alleles were analyzed

\*\* absence of transgenic sequences in the genome was assessed by PCR and GFP fluorescence in pollen



**Supplementary Table S7.** Tukey's multiple comparisons test for the experimental lines subjected to the heading time analysis (see Supplementary Table S6)

|                                   | Mean 1 | Mean 2 | N1 | N2 | Mean Diff, | 95,00% CI of diff, | Significant? | Summary | Adjusted P Value |
|-----------------------------------|--------|--------|----|----|------------|--------------------|--------------|---------|------------------|
| SC vs. WT 31-2                    | 63,75  | 65,30  | 61 | 27 | -1,542     | -3,406 to 0,3219   | No           | ns      | 0,2214           |
| SC vs. GE 31-2 d4                 | 63,75  | 64,61  | 61 | 59 | -0,8561    | -2,329 to 0,6165   | No           | ns      | 0,7538           |
| SC vs. WT 31-10                   | 63,75  | 63,56  | 61 | 45 | 0,1985     | -1,386 to 1,783    | No           | ns      | >0,9999          |
| SC vs. GE 31-10-19 d8             | 63,75  | 61,35  | 61 | 72 | 2,407      | 1,003 to 3,810     | Yes          | ****    | <0,0001          |
| SC vs. GE 31-7 d1                 | 63,75  | 64,73  | 61 | 51 | -0,9714    | -2,502 to 0,5588   | No           | ns      | 0,6347           |
| SC vs. GE 31-10-19 d1             | 63,75  | 64,31  | 61 | 48 | -0,5584    | -2,114 to 0,9976   | No           | ns      | 0,9904           |
| SC vs. GE 31-10-2 d1              | 63,75  | 64,17  | 61 | 24 | -0,4126    | -2,356 to 1,531    | No           | ns      | >0,9999          |
| SC vs. GE 31-7 i1                 | 63,75  | 64,96  | 61 | 45 | -1,201     | -2,786 to 0,3833   | No           | ns      | 0,3494           |
| SC vs. GE 31-10 i1                | 63,75  | 63,87  | 61 | 45 | -0,1126    | -1,697 to 1,472    | No           | ns      | >0,9999          |
| SC vs. GE 31-10-9 i1              | 63,75  | 63,30  | 61 | 30 | 0,4541     | -1,344 to 2,252    | No           | ns      | 0,9996           |
| SC vs. GE 31-10-15 i1             | 63,75  | 64,04  | 61 | 45 | -0,2903    | -1,875 to 1,294    | No           | ns      | >0,9999          |
| WT 31-2 vs. GE 31-2 d4            | 65,30  | 64,61  | 27 | 59 | 0,6861     | -1,188 to 2,560    | No           | ns      | 0,9887           |
| WT 31-2 vs. WT 31-10              | 65,30  | 63,56  | 27 | 45 | 1,741      | -0,2225 to 3,704   | No           | ns      | 0,1401           |
| WT 31-2 vs. GE 31-10-19 d8        | 65,30  | 61,35  | 27 | 72 | 3,949      | 2,129 to 5,769     | Yes          | ****    | <0,0001          |
| WT 31-2 vs. GE 31-7 d1            | 65,30  | 64,73  | 27 | 51 | 0,5708     | -1,349 to 2,490    | No           | ns      | 0,9981           |
| WT 31-2 vs. GE 31-10-19 d1        | 65,30  | 64,31  | 27 | 48 | 0,9838     | -0,9563 to 2,924   | No           | ns      | 0,8834           |
| WT 31-2 vs. GE 31-10-2 d1         | 65,30  | 64,17  | 27 | 24 | 1,130      | -1,133 to 3,392    | No           | ns      | 0,8939           |
| WT 31-2 vs. GE 31-7 i1            | 65,30  | 64,96  | 27 | 45 | 0,3407     | -1,622 to 2,304    | No           | ns      | >0,9999          |
| WT 31-2 vs. GE 31-10 i1           | 65,30  | 63,87  | 27 | 45 | 1,430      | -0,5336 to 3,393   | No           | ns      | 0,4144           |
| WT 31-2 vs. GE 31-10-9 i1         | 65,30  | 63,30  | 27 | 30 | 1,996      | -0,1430 to 4,136   | No           | ns      | 0,0940           |
| WT 31-2 vs. GE 31-10-15 i1        | 65,30  | 64,04  | 27 | 45 | 1,252      | -0,7113 to 3,215   | No           | ns      | 0,6280           |
| GE 31-2 d4 vs. WT 31-10           | 64,61  | 63,56  | 59 | 45 | 1,055      | -0,5415 to 2,651   | No           | ns      | 0,5731           |
| GE 31-2 d4 vs. GE 31-10-19 d8     | 64,61  | 61,35  | 59 | 72 | 3,263      | 1,847 to 4,679     | Yes          | ****    | <0,0001          |
| GE 31-2 d4 vs. GE 31-7 d1         | 64,61  | 64,73  | 59 | 51 | -0,1153    | -1,657 to 1,427    | No           | ns      | >0,9999          |
| GE 31-2 d4 vs. GE 31-10-19 d1     | 64,61  | 64,31  | 59 | 48 | 0,2977     | -1,270 to 1,865    | No           | ns      | >0,9999          |
| GE 31-2 d4 vs. GE 31-10-2 d1      | 64,61  | 64,17  | 59 | 24 | 0,4435     | -1,509 to 2,396    | No           | ns      | 0,9999           |
| GE 31-2 d4 vs. GE 31-7 i1         | 64,61  | 64,96  | 59 | 45 | -0,3454    | -1,942 to 1,251    | No           | ns      | >0,9999          |
| GE 31-2 d4 vs. GE 31-10 i1        | 64,61  | 63,87  | 59 | 45 | 0,7435     | -0,8526 to 2,340   | No           | ns      | 0,9321           |
| GE 31-2 d4 vs. GE 31-10-9 i1      | 64,61  | 63,30  | 59 | 30 | 1,310      | -0,4982 to 3,119   | No           | ns      | 0,4228           |
| GE 31-2 d4 vs. GE 31-10-15 i1     | 64,61  | 64,04  | 59 | 45 | 0,5657     | -1,030 to 2,162    | No           | ns      | 0,9914           |
| WT 31-10 vs. GE 31-10-19 d8       | 63,56  | 61,35  | 45 | 72 | 2,208      | 0,6758 to 3,741    | Yes          | ***     | 0,0002           |
| WT 31-10 vs. GE 31-7 d1           | 63,56  | 64,73  | 45 | 51 | -1,170     | -2,819 to 0,4795   | No           | ns      | 0,4577           |
| WT 31-10 vs. GE 31-10-19 d1       | 63,56  | 64,31  | 45 | 48 | -0,7569    | -2,430 to 0,9165   | No           | ns      | 0,9443           |
| WT 31-10 vs. GE 31-10-2 d1        | 63,56  | 64,17  | 45 | 24 | -0,6111    | -2,650 to 1,427    | No           | ns      | 0,9980           |
| WT 31-10 vs. GE 31-7 i1           | 63,56  | 64,96  | 45 | 45 | -1,400     | -3,100 to 0,3002   | No           | ns      | 0,2276           |
| WT 31-10 vs. GE 31-10-7 i1        | 63,56  | 63,87  | 45 | 45 | -0,3111    | -2,011 to 1,389    | No           | ns      | >0,9999          |
| WT 31-10 vs. GE 31-10-9 i1        | 63,56  | 63,30  | 45 | 30 | 0,2556     | -1,645 to 2,156    | No           | ns      | >0,9999          |
| WT 31-10 vs. GE 31-10-15 i1       | 63,56  | 64,04  | 45 | 45 | -0,4889    | -2,189 to 1,211    | No           | ns      | 0,9986           |
| GE 31-10-19 d8 vs. GE 31-7 d1     | 61,35  | 64,73  | 72 | 51 | -3,378     | -4,854 to -1,902   | Yes          | ****    | <0,0001          |
| GE 31-10-19 d8 vs. GE 31-10-19 d1 | 61,35  | 64,31  | 72 | 48 | -2,965     | -4,468 to -1,463   | Yes          | ****    | <0,0001          |
| GE 31-10-19 d8 vs. GE 31-10-2 d1  | 61,35  | 64,17  | 72 | 24 | -2,819     | -4,720 to -0,9186  | Yes          | ****    | <0,0001          |
| GE 31-10-19 d8 vs. GE 31-7 i1     | 61,35  | 64,96  | 72 | 45 | -3,608     | -5,141 to -2,076   | Yes          | ****    | <0,0001          |
| GE 31-10-19 d8 vs. GE 31-10 i1    | 61,35  | 63,87  | 72 | 45 | -2,519     | -4,052 to -0,9869  | Yes          | ****    | <0,0001          |
| GE 31-10-19 d8 vs. GE 31-10-9 i1  | 61,35  | 63,30  | 72 | 30 | -1,953     | -3,705 to -0,2003  | Yes          | *       | 0,0146           |
| GE 31-10-19 d8 vs. GE 31-10-15 i1 | 61,35  | 64,04  | 72 | 45 | -2,697     | -4,230 to -1,165   | Yes          | ****    | <0,0001          |
| GE 31-7 d1 vs. GE 31-10-19 d1     | 64,73  | 64,31  | 51 | 48 | 0,4130     | -1,209 to 2,035    | No           | ns      | 0,9996           |
| GE 31-7 d1 vs. GE 31-10-2 d1      | 64,73  | 64,17  | 51 | 24 | 0,5588     | -1,437 to 2,555    | No           | ns      | 0,9989           |
| GE 31-7 d1 vs. GE 31-7 i1         | 64,73  | 64,96  | 51 | 45 | -0,2301    | -1,879 to 1,419    | No           | ns      | >0,9999          |
| GE 31-7 d1 vs. GE 31-10 i1        | 64,73  | 63,87  | 51 | 45 | 0,8588     | -0,7906 to 2,508   | No           | ns      | 0,8636           |
| GE 31-7 d1 vs. GE 31-10-9 i1      | 64,73  | 63,30  | 51 | 30 | 1,425      | -0,4301 to 3,281   | No           | ns      | 0,3286           |
| GE 31-7 d1 vs. GE 31-10-15 i1     | 64,73  | 64,04  | 51 | 45 | 0,6810     | -0,9684 to 2,330   | No           | ns      | 0,9711           |

|                                   | Mean<br>1 | Mean<br>2 | N1 | N2 | Mean Diff, | 95,00% CI of diff, | Significant? | Summary | Adjusted<br>P Value |
|-----------------------------------|-----------|-----------|----|----|------------|--------------------|--------------|---------|---------------------|
| GE 31-10-19 d1 vs. GE 31-10-2 d1  | 64,31     | 64,17     | 48 | 24 | 0,1458     | -1,870 to 2,162    | No           | ns      | >0,9999             |
| GE 31-10-19 d1 vs. GE 31-7 il     | 64,31     | 64,96     | 48 | 45 | -0,6431    | -2,316 to 1,030    | No           | ns      | 0,9834              |
| GE 31-10-19 d1 vs. GE 31-10 il    | 64,31     | 63,87     | 48 | 45 | 0,4458     | -1,228 to 2,119    | No           | ns      | 0,9993              |
| GE 31-10-19 d1 vs. GE 31-10-9 il  | 64,31     | 63,30     | 48 | 30 | 1,013      | -0,8644 to 2,889   | No           | ns      | 0,8333              |
| GE 31-10-19 d1 vs. GE 31-10-15 il | 64,31     | 64,04     | 48 | 45 | 0,2681     | -1,405 to 1,941    | No           | ns      | >0,9999             |
| GE 31-10-2 d1 vs. GE 31-7 il      | 64,17     | 64,96     | 24 | 45 | -0,7889    | -2,827 to 1,250    | No           | ns      | 0,9824              |
| GE 31-10-2 d1 vs. GE 31-10 il     | 64,17     | 63,87     | 24 | 45 | 0,3000     | -1,738 to 2,338    | No           | ns      | >0,9999             |
| GE 31-10-2 d1 vs. GE 31-10-9 il   | 64,17     | 63,30     | 24 | 30 | 0,8667     | -1,342 to 3,075    | No           | ns      | 0,9804              |
| GE 31-10-2 d1 vs. GE 31-10-15 il  | 64,17     | 64,04     | 24 | 45 | 0,1222     | -1,916 to 2,161    | No           | ns      | >0,9999             |
| GE 31-7 il vs. GE 31-10 il        | 64,96     | 63,87     | 45 | 45 | 1,089      | -0,6113 to 2,789   | No           | ns      | 0,6214              |
| GE 31-7 il vs. GE 31-10-9 il      | 64,96     | 63,30     | 45 | 30 | 1,656      | -0,2453 to 3,556   | No           | ns      | 0,1590              |
| GE 31-7 il vs. GE 31-10-15 il     | 64,96     | 64,04     | 45 | 45 | 0,9111     | -0,7891 to 2,611   | No           | ns      | 0,8393              |
| GE 31-10 il vs. GE 31-10-9 il     | 63,87     | 63,30     | 45 | 30 | 0,5667     | -1,334 to 2,468    | No           | ns      | 0,9981              |
| GE 31-10 il vs. GE 31-10-15 il    | 63,87     | 64,04     | 45 | 45 | -0,1778    | -1,878 to 1,522    | No           | ns      | >0,9999             |
| GE 31-10-9 il vs. GE 31-10-15 il  | 63,30     | 64,04     | 30 | 45 | -0,7444    | -2,645 to 1,156    | No           | ns      | 0,9807              |
